# Supplementary material for: UPLC-ESI-Q-TOF-MSE-based metabolomics analysis of Acer mono sap and evaluation of osteogenic activity in mouse osteoblast cells
Source: Royal Society of Chemistry journal article supplement (doi:10.1039/d2fo01948e), 2022-01-01

## Supplementary Information

### UPLC-ESI-Q-TOF-MS<sup>E</sup> -based metabolomics analysis of *Acer mono Sap* and evaluation for osteogenic activity in mouse osteoblast cells

Karthi Natesan<sup>a,#</sup>, Thimmarayan Srivalli<sup>b,#</sup>, Harshavardhan Mohan<sup>c</sup>, Arul Jayaprakash<sup>b</sup>, and  
Vaikundamoorthy Ramalingam<sup>d,e\*</sup>

<sup>a</sup>School of Allied Health Sciences, REVA University, Bengaluru, India

<sup>b</sup>Department of Chemistry, Research Institute of Physics and Chemistry,  
Jeonbuk National University, Jeonju 54896, Republic of Korea.

<sup>c</sup>PG and Research Department of Biochemistry, Sacred Heart College (Autonomous),  
Tirupattur - 635601, Tamil Nadu, India

(Affiliated to Thiruvallur University, Serkkadu, Vellore – 632115, Tamil Nadu, India)

<sup>d</sup>Centre for Natural Products & Traditional Knowledge

CSIR-Indian Institute of Chemical Technology, Hyderabad, India

<sup>e</sup>Academy of Scientific and Innovative Research (AcSIR), Ghaziabad – 201002, India

# Equal contribution.

\*Corresponding Email: ramalingam@iict.res.in

**Table S1 List of forward and reverse primers used in the gene expression studies by qRT-PCR analysis**

| <b>Gene</b>          | <b>Forward primer</b>   | <b>Reverse primers</b> | <b>Tm</b>  |
|----------------------|-------------------------|------------------------|------------|
| Alkaline Phosphatase | CACAGATTCCCAAAGCACCT    | GGGATGGAGGAGAGAAGGTC   | 55.45/59.5 |
| Osteocalcin          | CCTGAGTCTGACAAAGCCTTCA  | GCCGGAGTCTGTTCACTACCTT | 58.4/60.0  |
| Collagen1 $\alpha$ 1 | GCTTCACCTACAGCACCCCTTGT | TGACTGTCTTGCCCCAAGTTC  | 60.0/58.20 |
| Osteopontin          | CCCGGTGAAAGTGACTGATTCT  | GATCTGGGTGCAGGCTGTAAA  | 58.4/58.2  |
| Runx2                | GGCACAGACAGAAGCTTGATGA  | GAATGCGCCCTAAATCACTGA  | 58.4/56.2  |
| Osterix              | GGAGGTTTCACTCCATTCCA    | TAGAAGGAGCAGGGGACAGA   | 55.4/57.4  |

**Fig. S1**

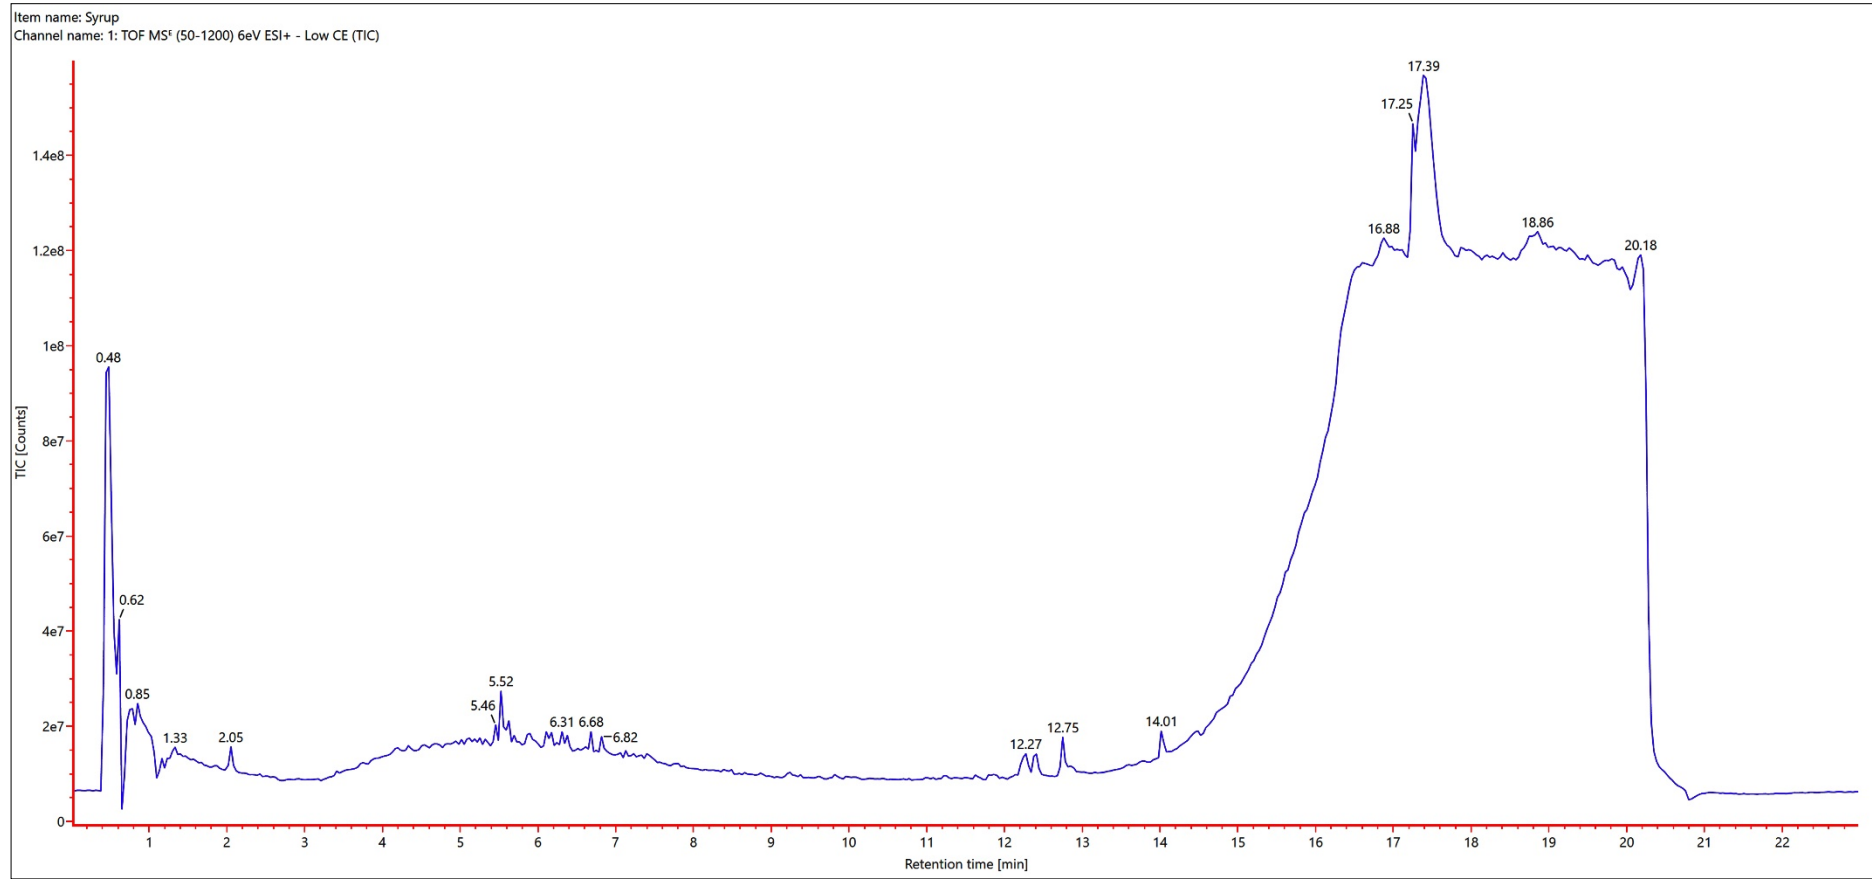

Fig. S2

a)

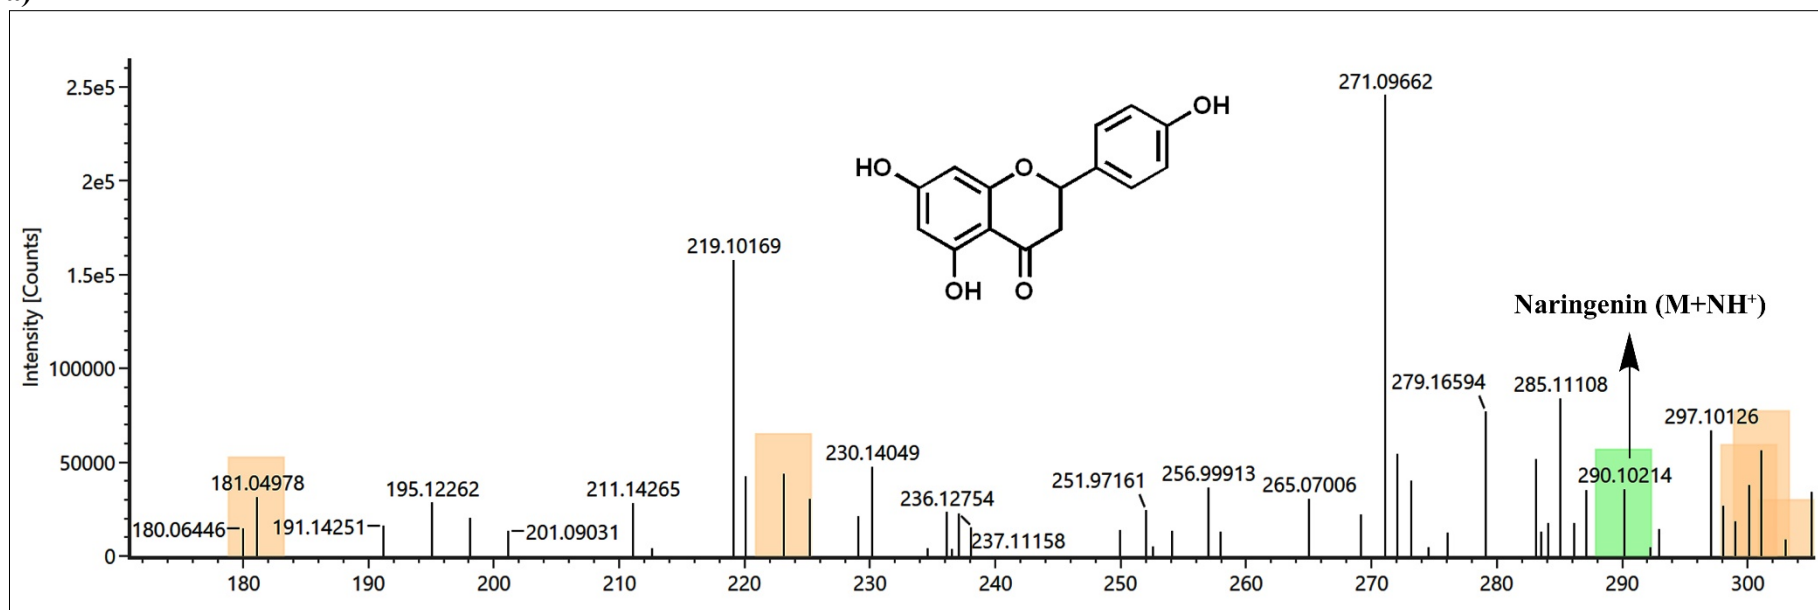

b)

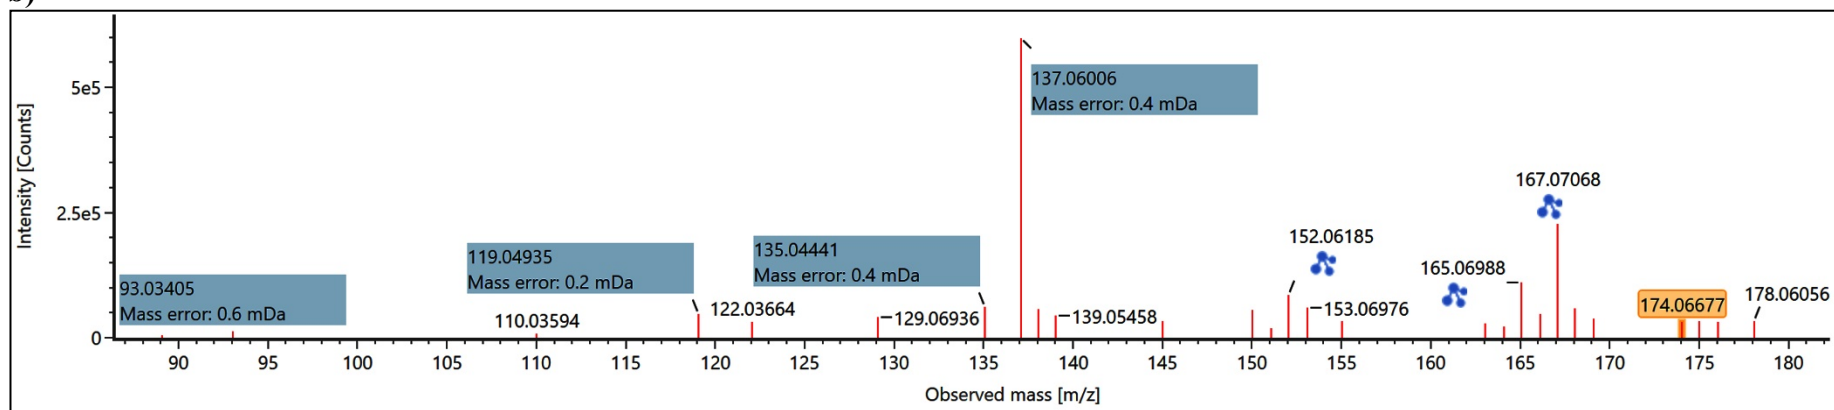

Fig. S3

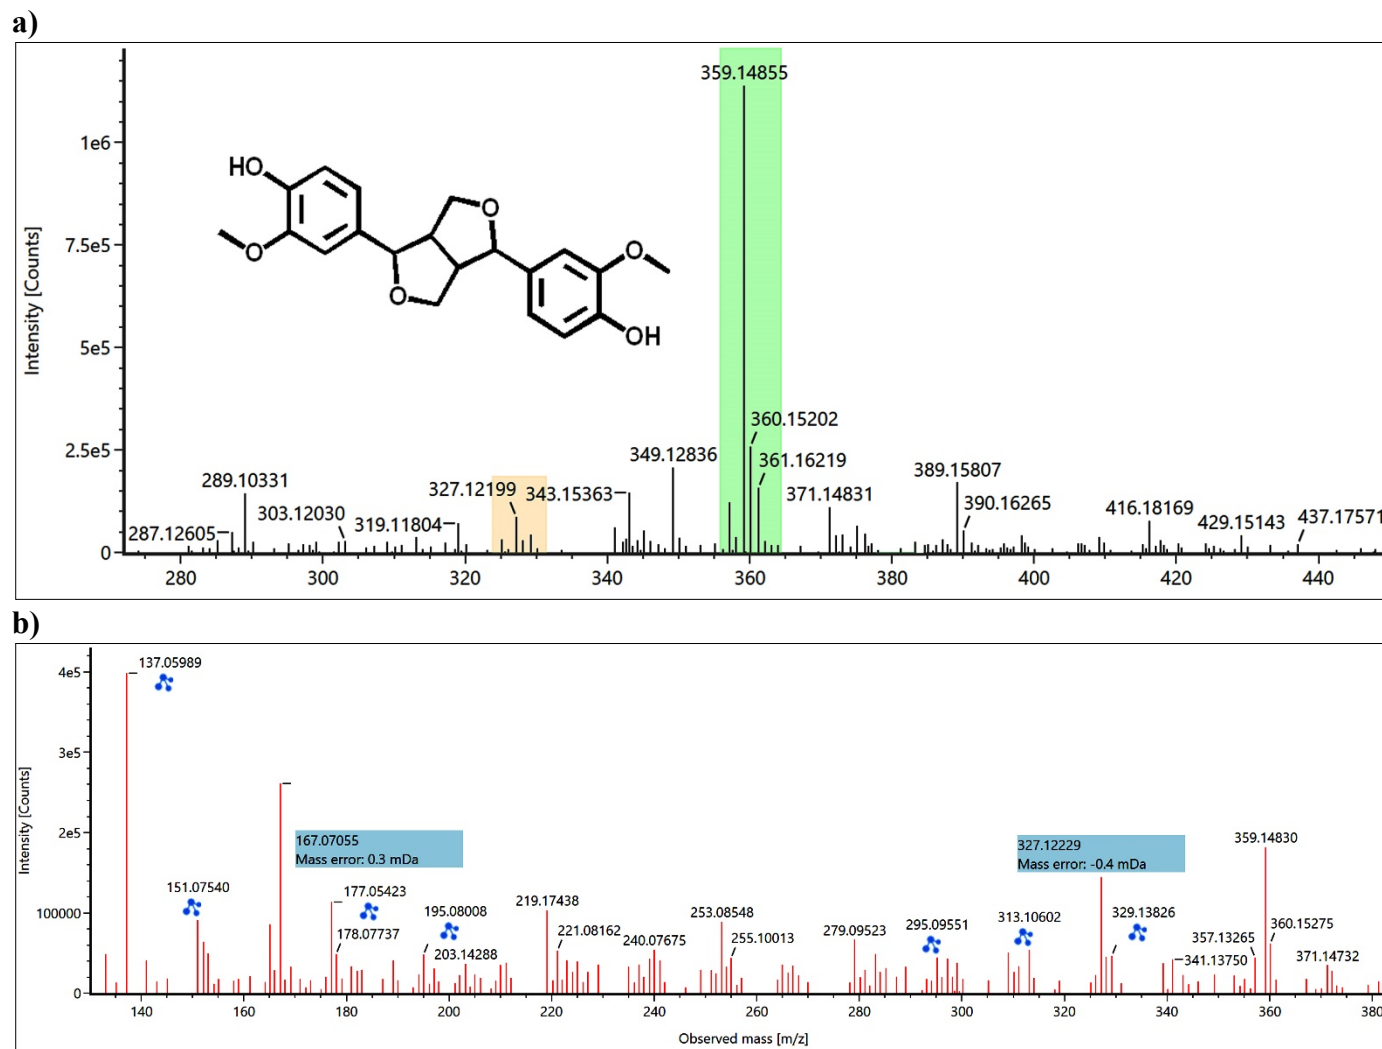

**Fig. S4** Structures of the compounds identified from SAM using MS/MS fragmentation analysis

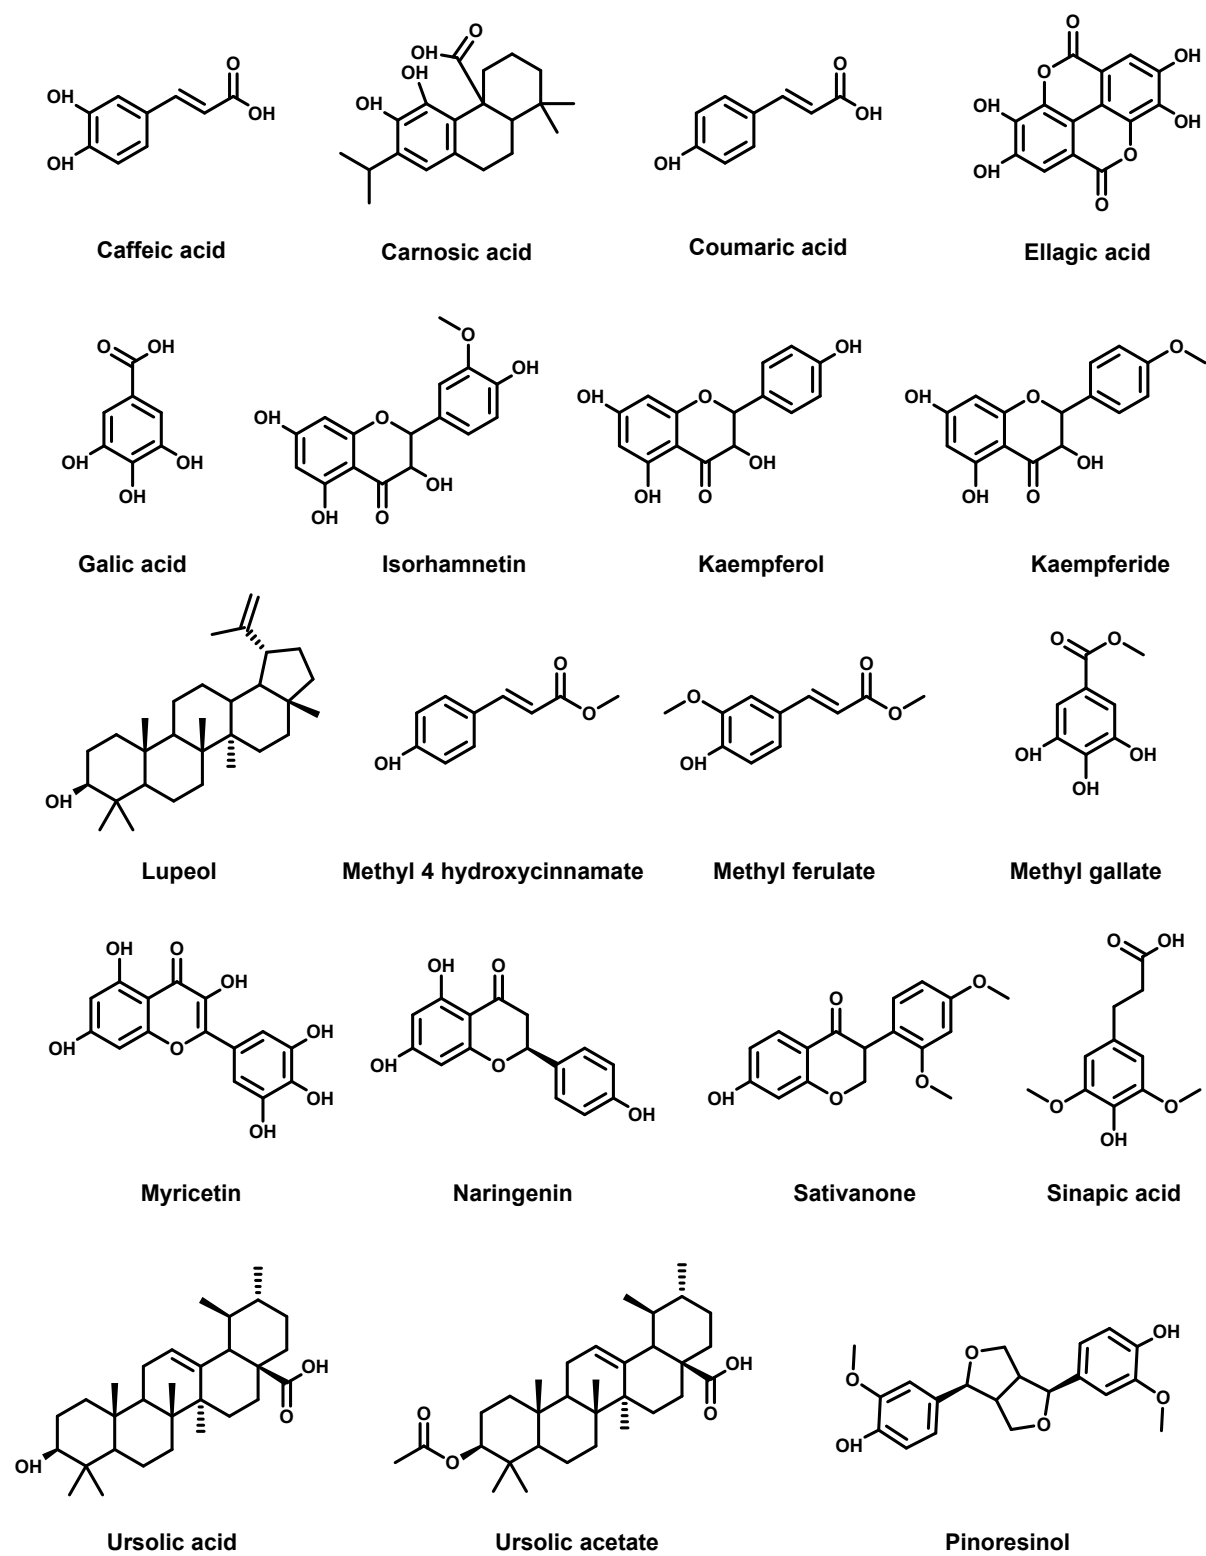

Supplement: d2fo01948e1.pdf [file d2fo01948e1.pdf]
